# Supplementary material
Source: PubMed Central journal article supplement (PMC9984382)

Figure 1a

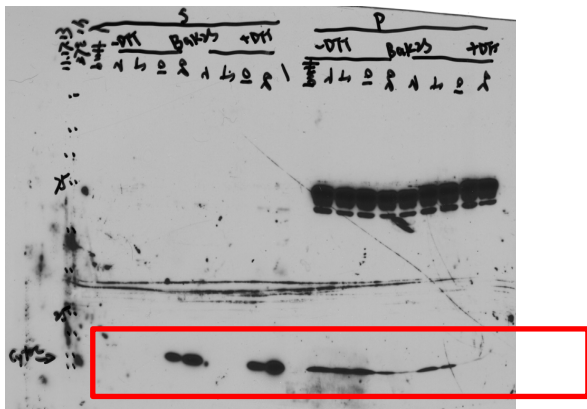

Figure 1b

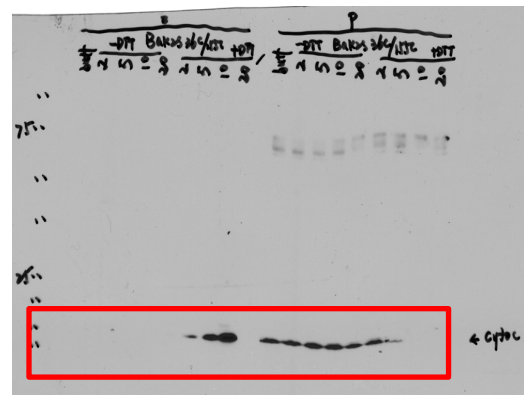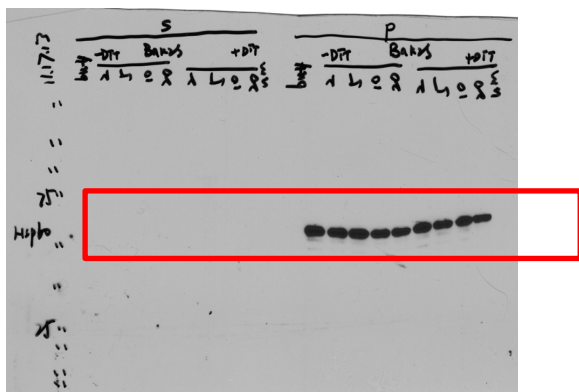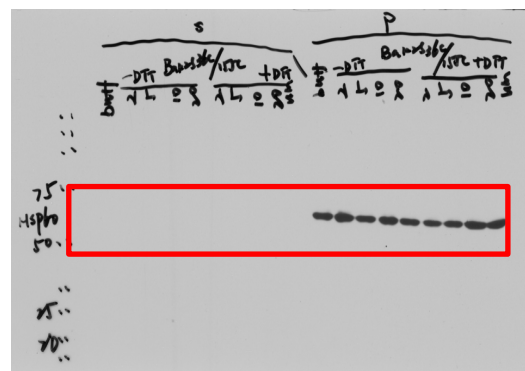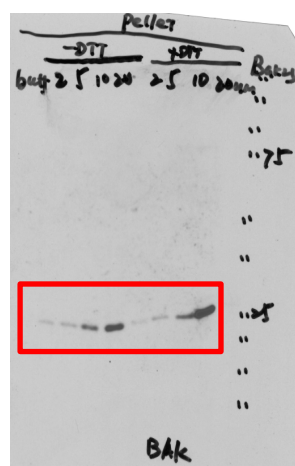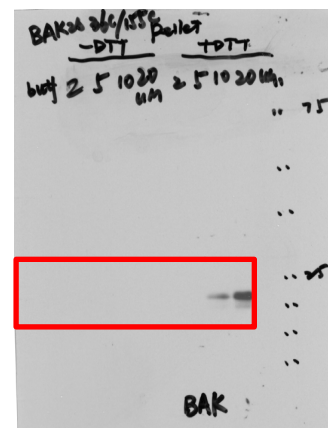

Figure 1c

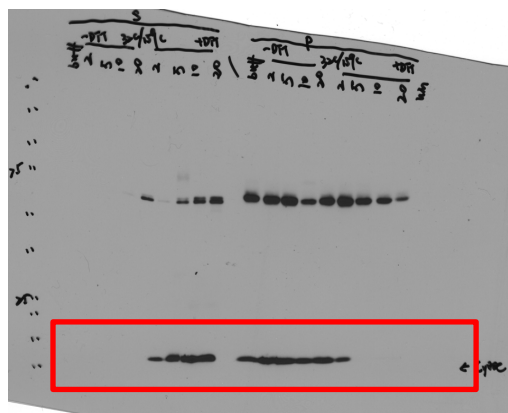

Figure 1d

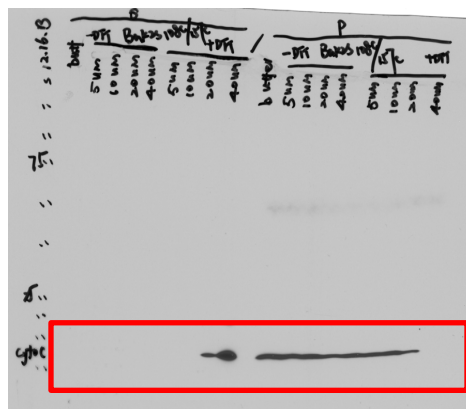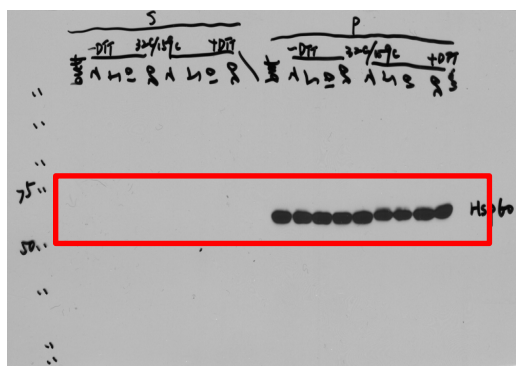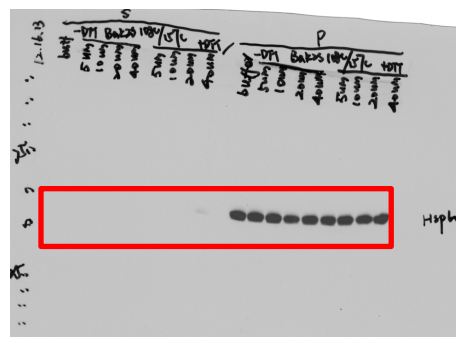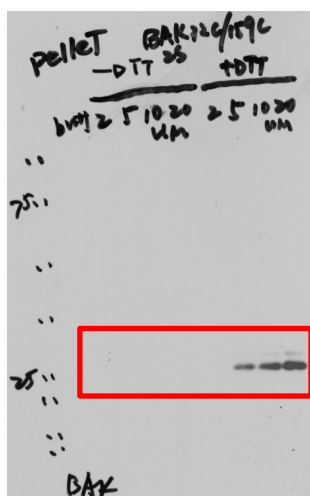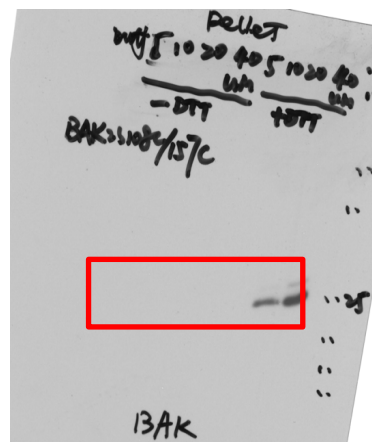

Figure 1e

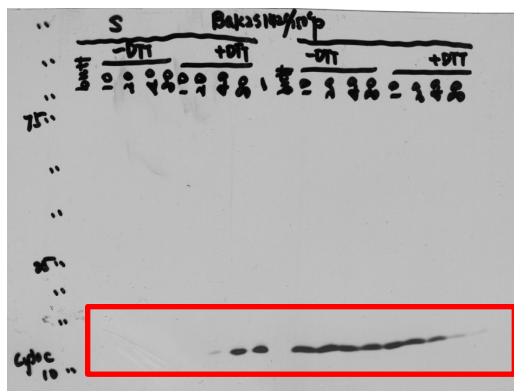

Figure 1f

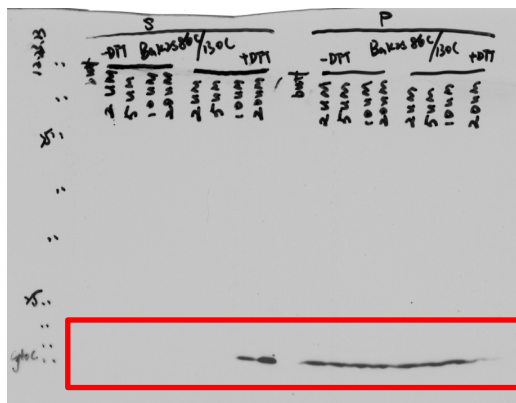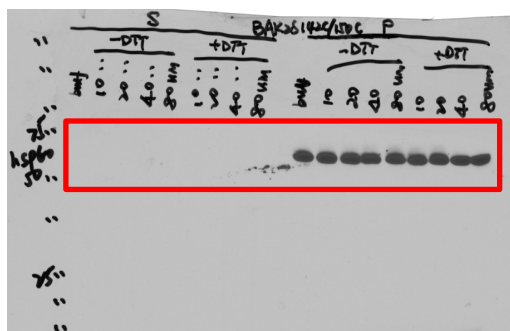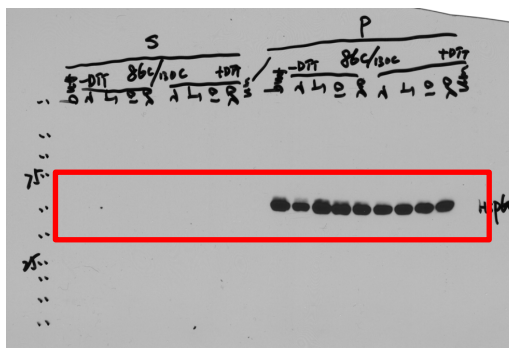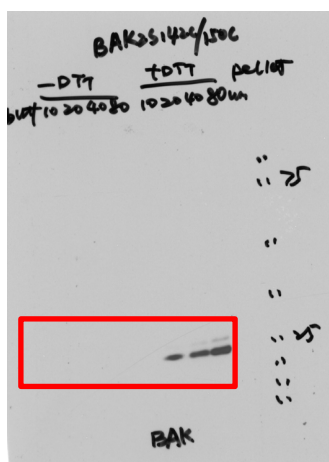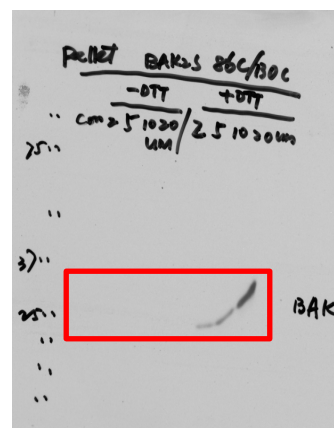

Figure 1g

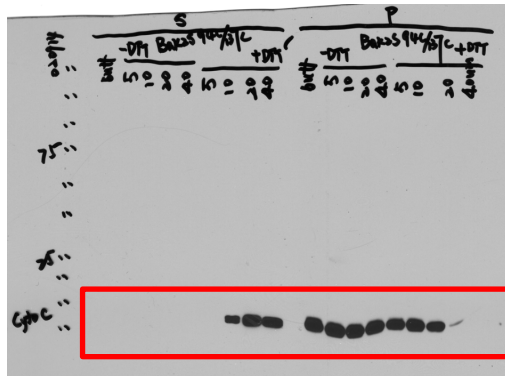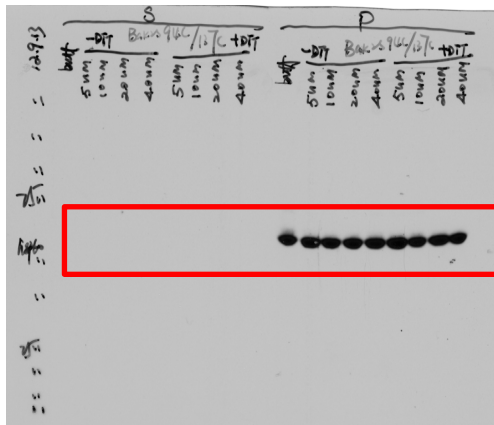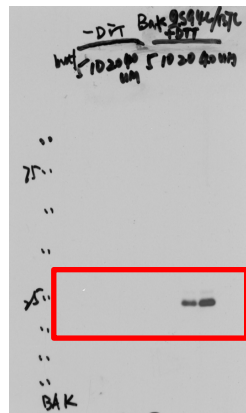

Figure 2c

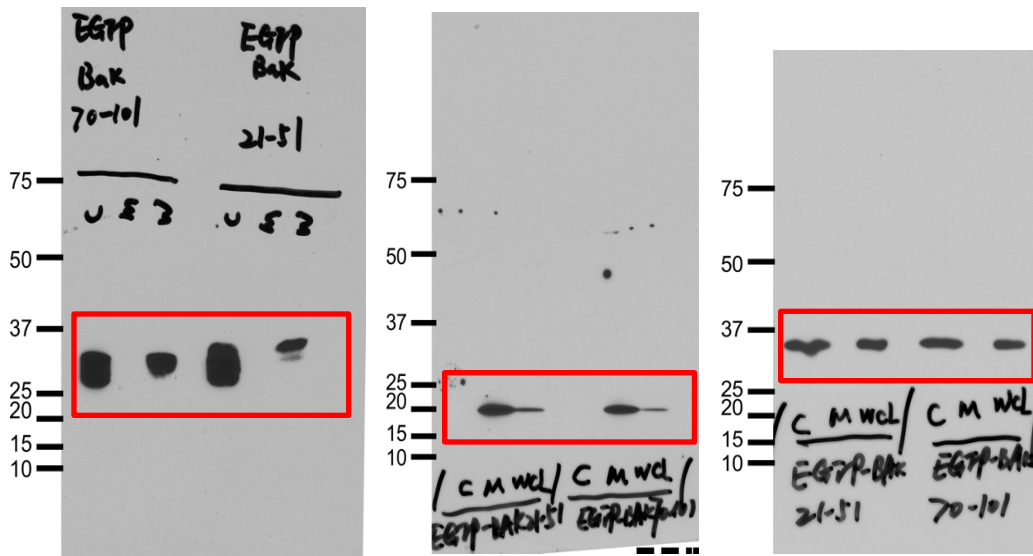

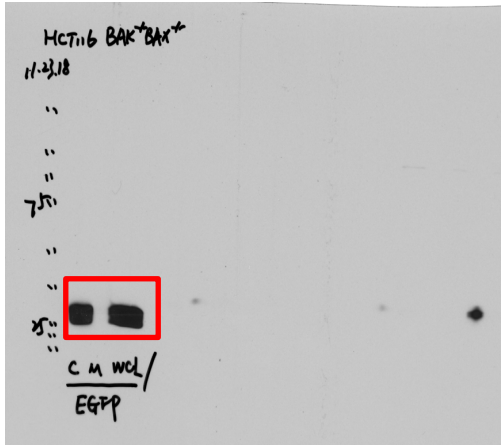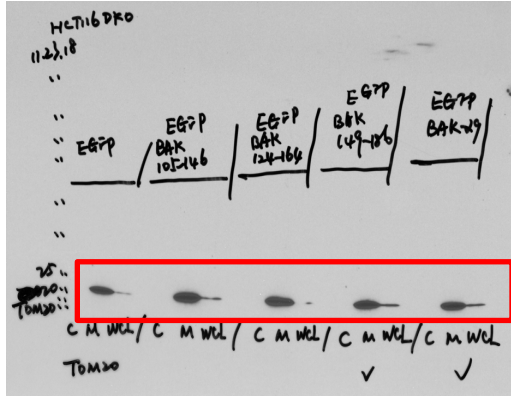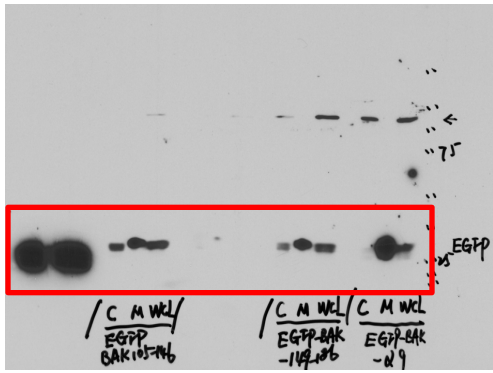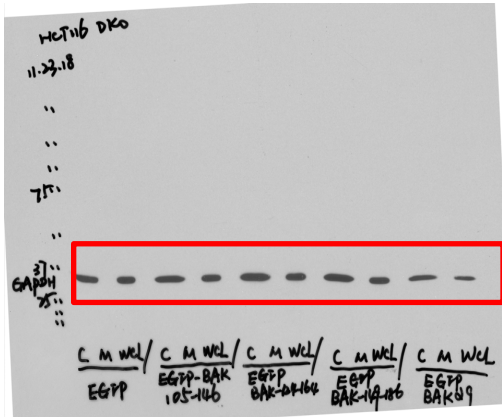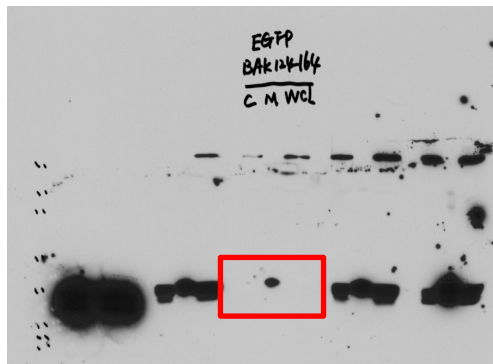

Figure 4a

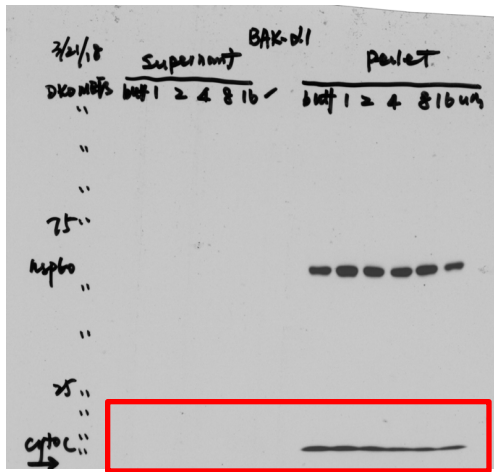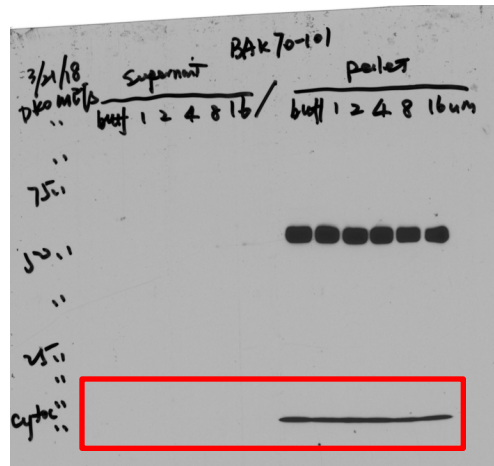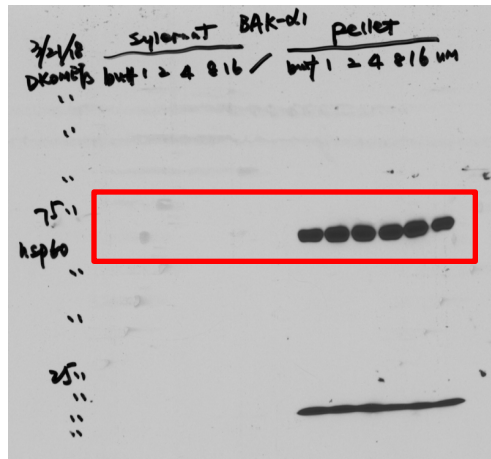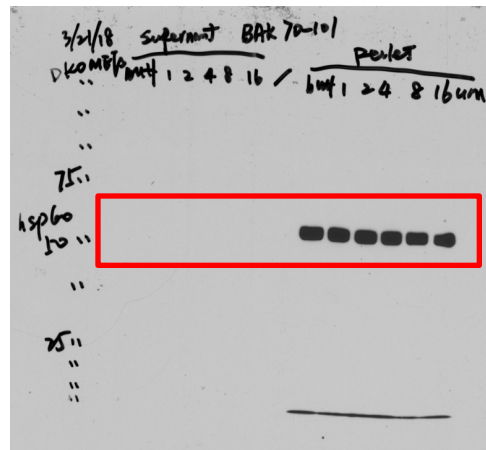

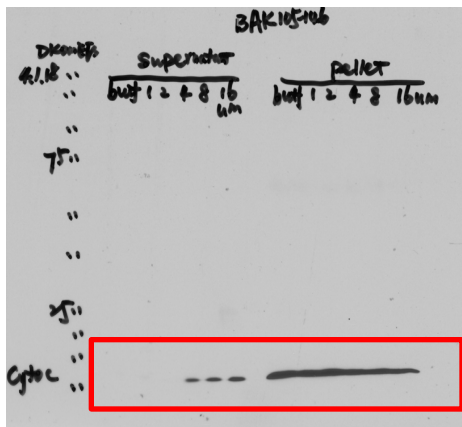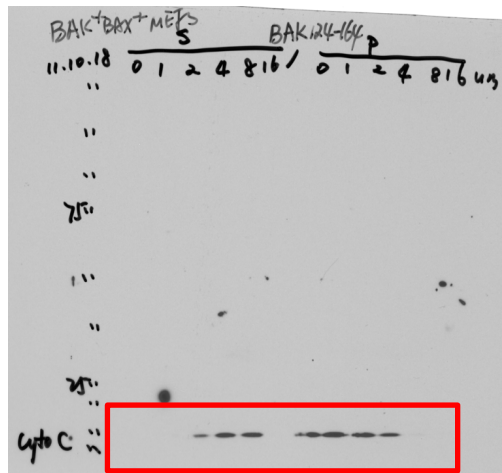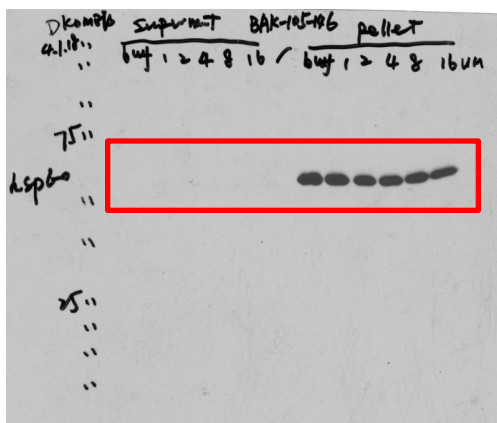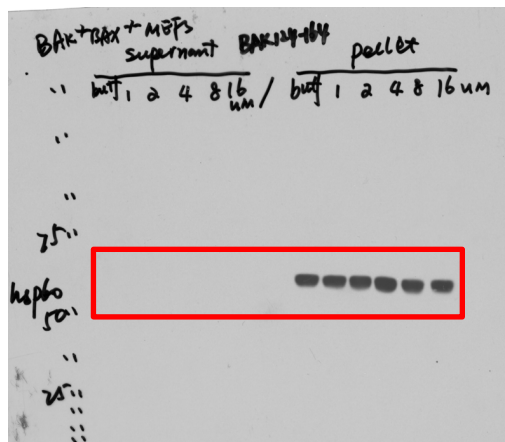



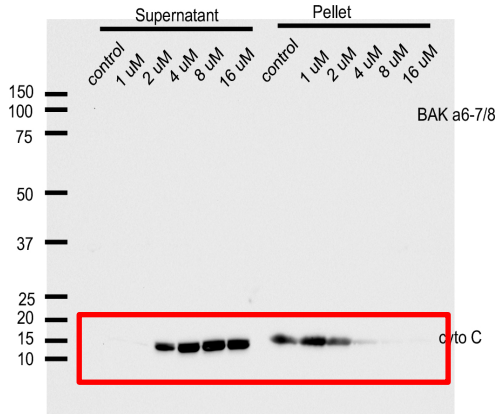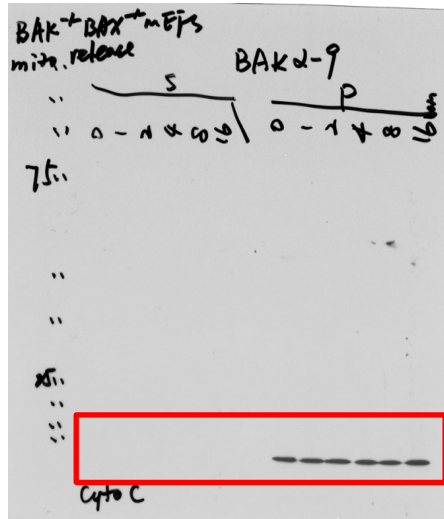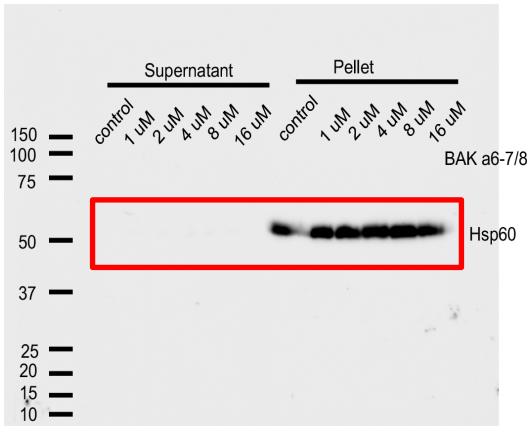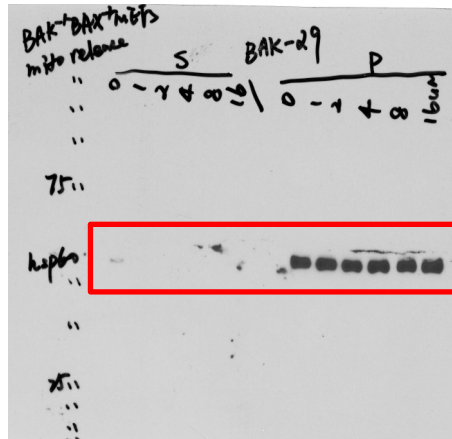

Figure 4b

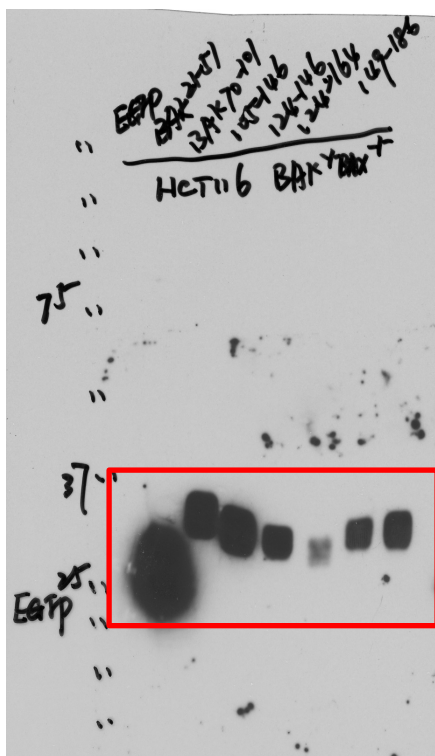

Figure 4c

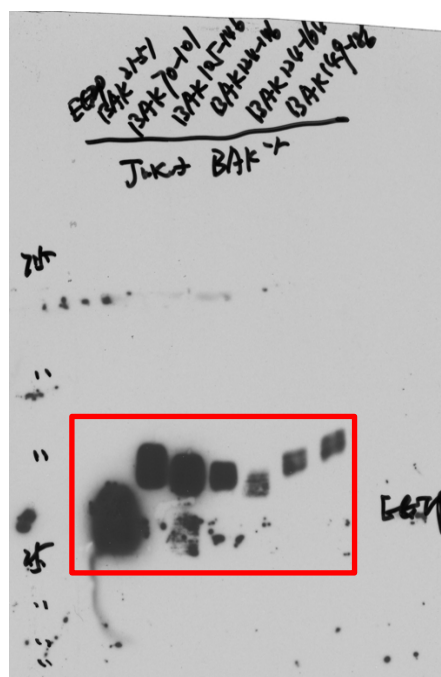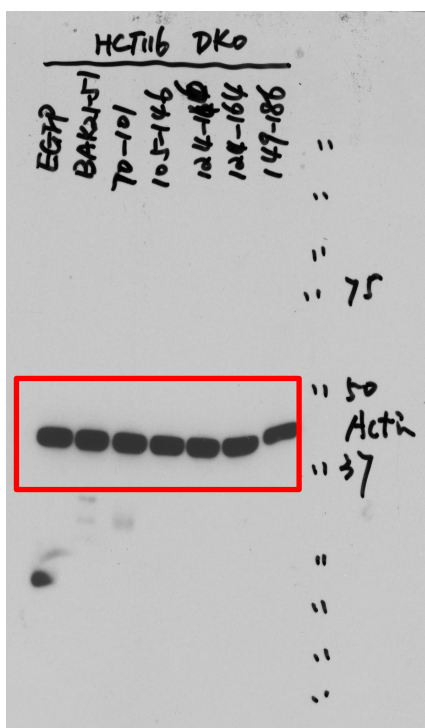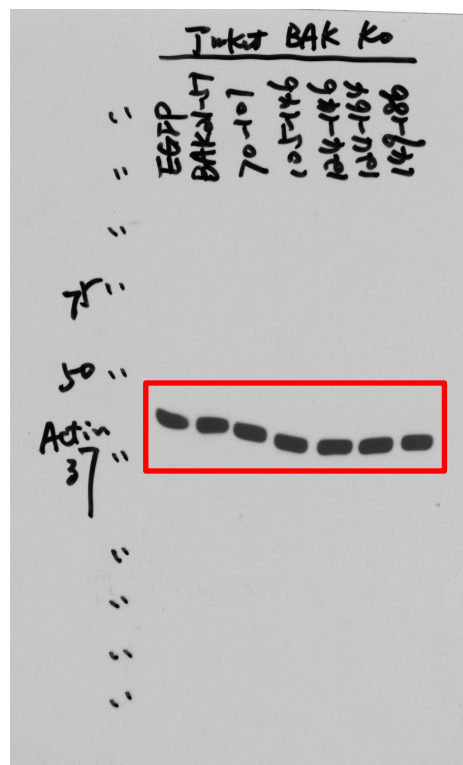

Figure 4d

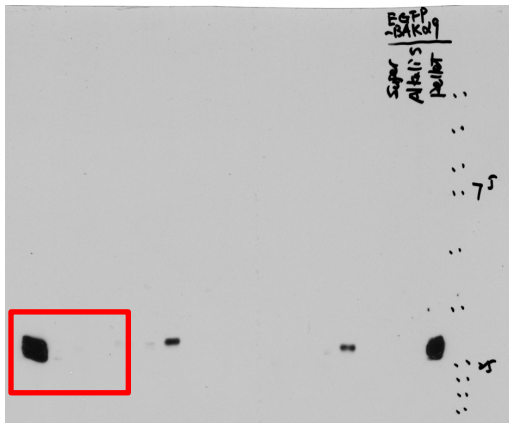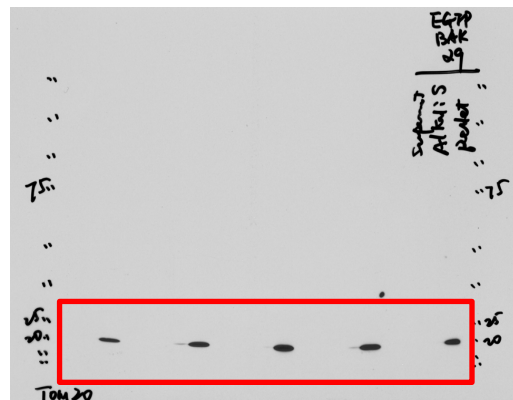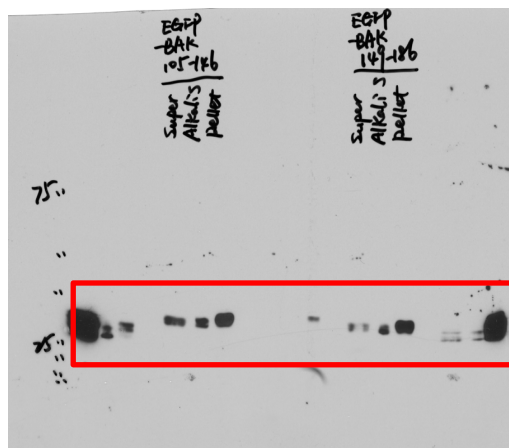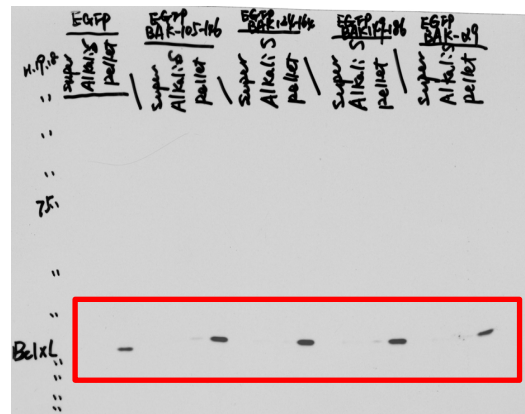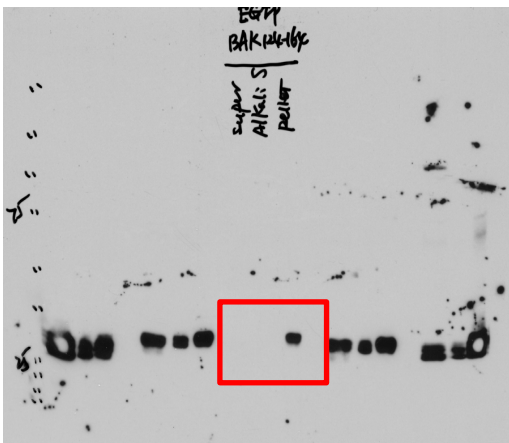

Figure 5g

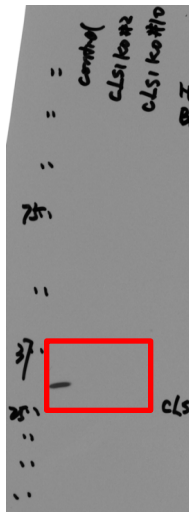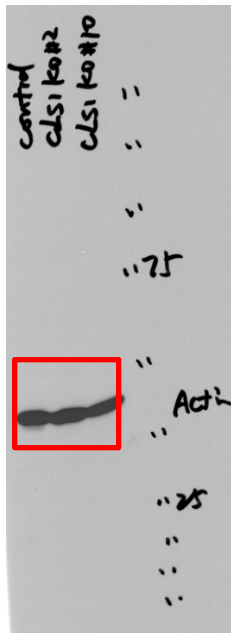

Figure 5h

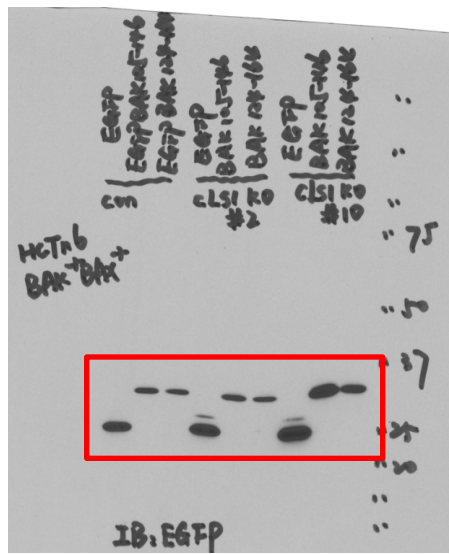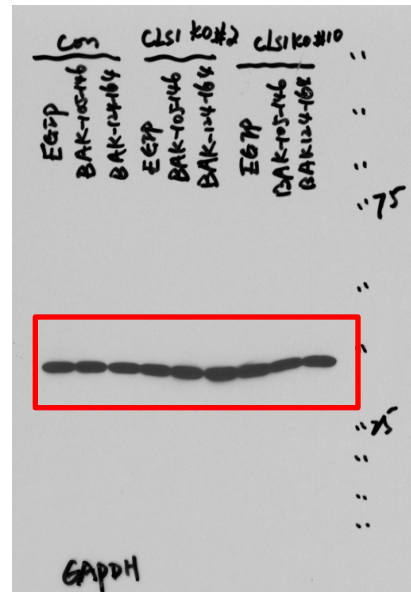

Figure 5i

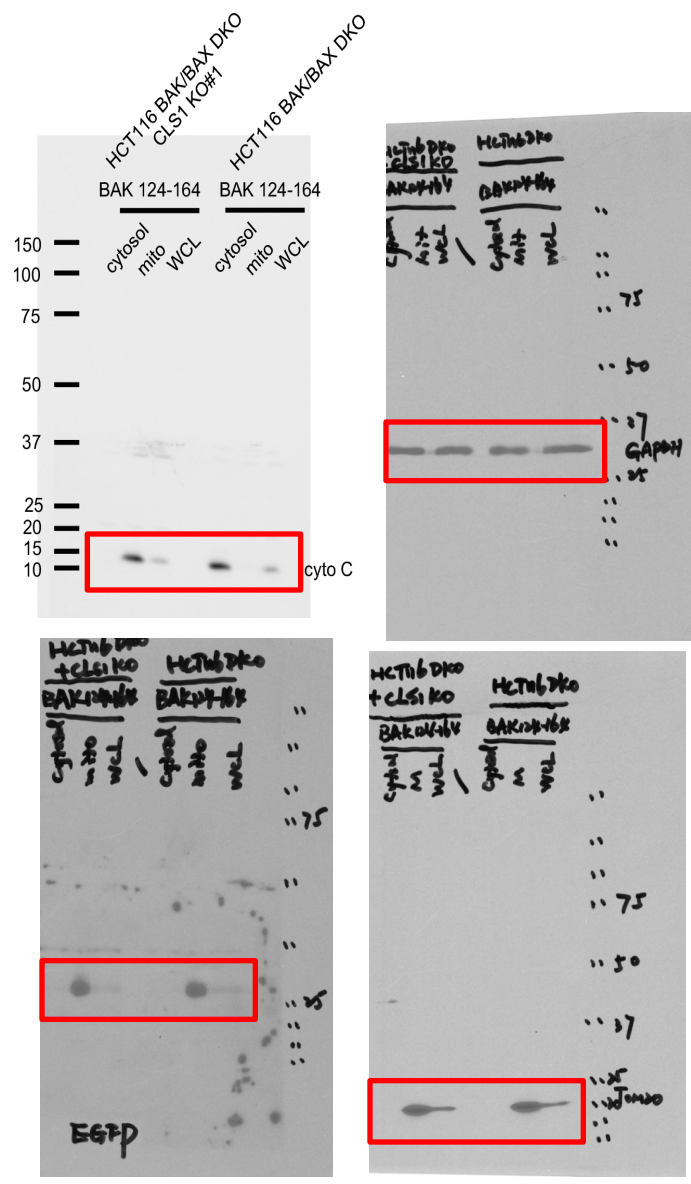

Figure 5j

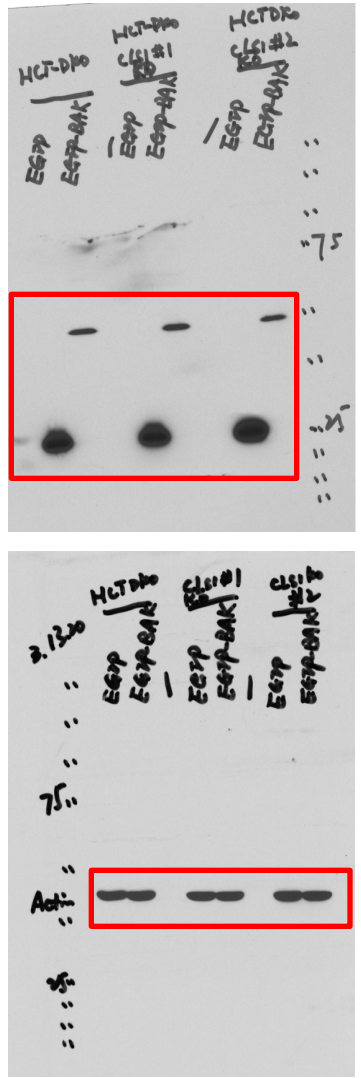

Figure 6b

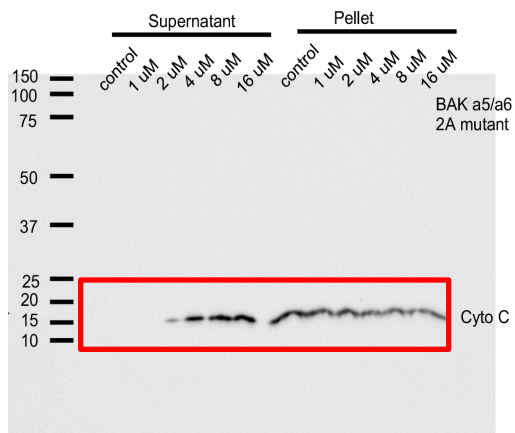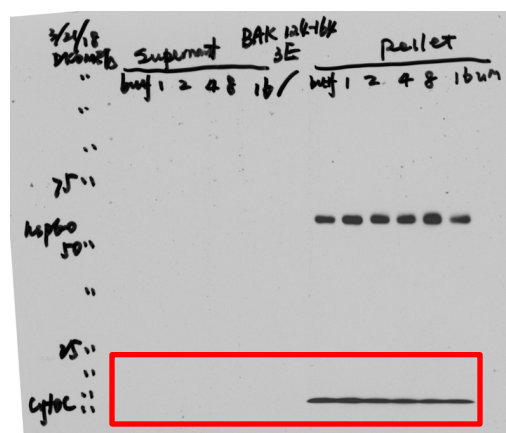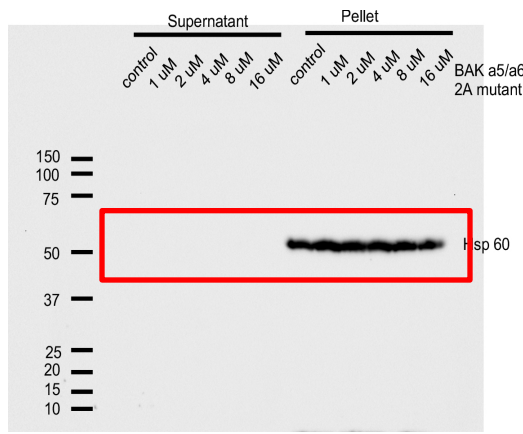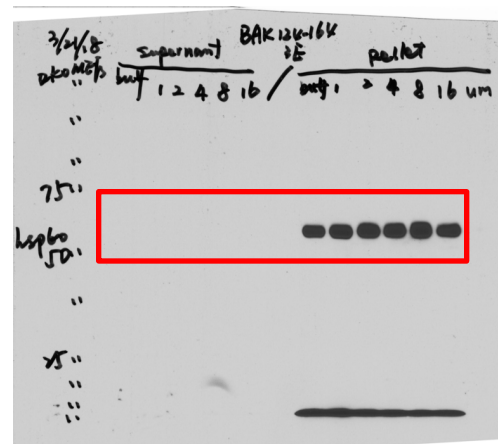

Figure 6c

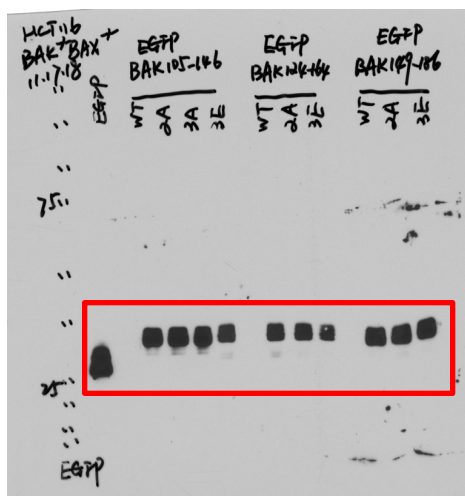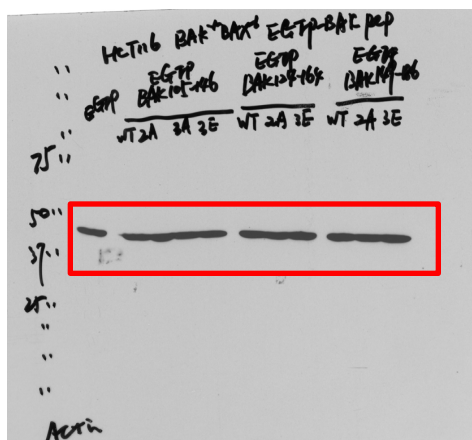

Figure 6d

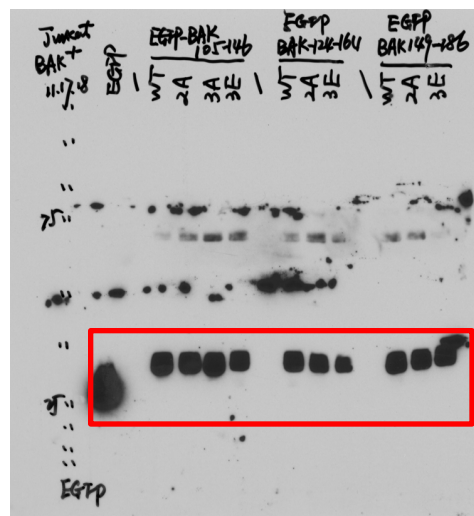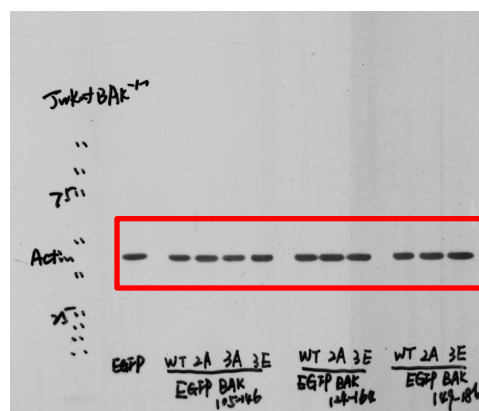

Figure 6f

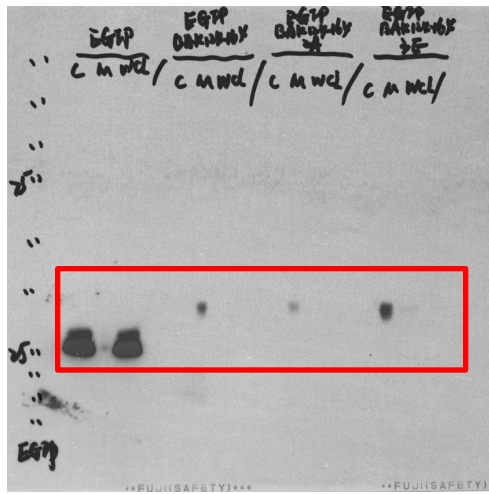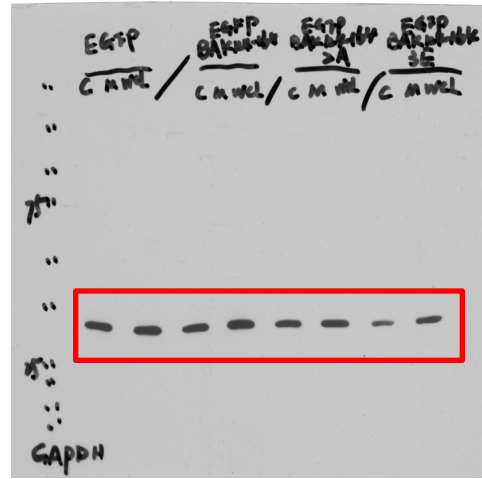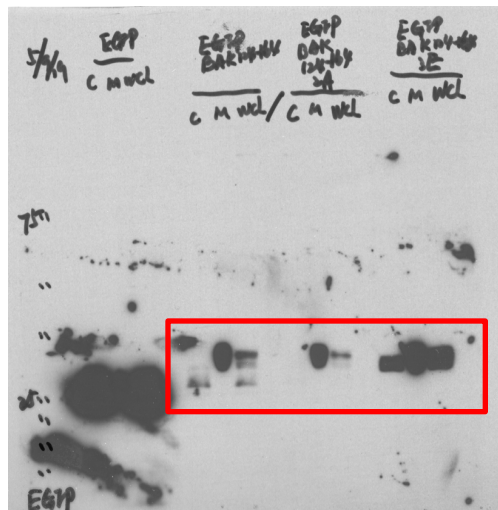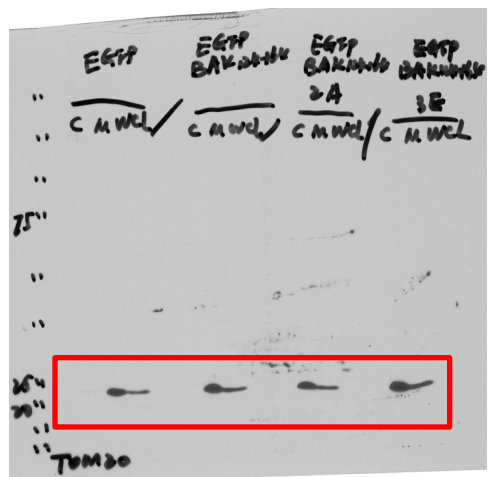



Figure 6g

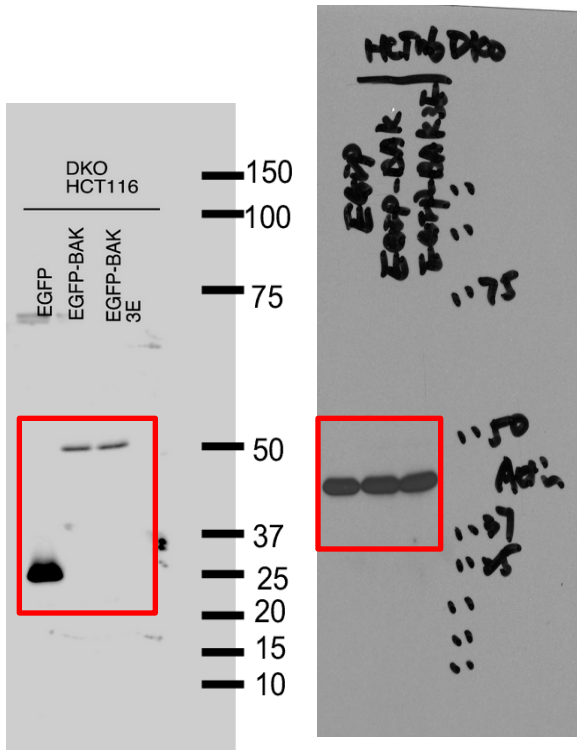

Figure 7b

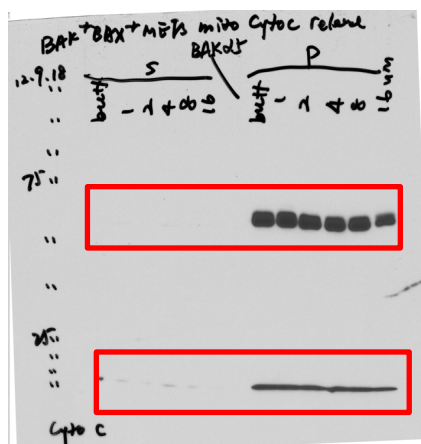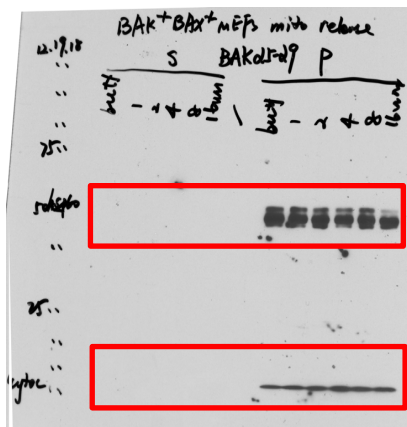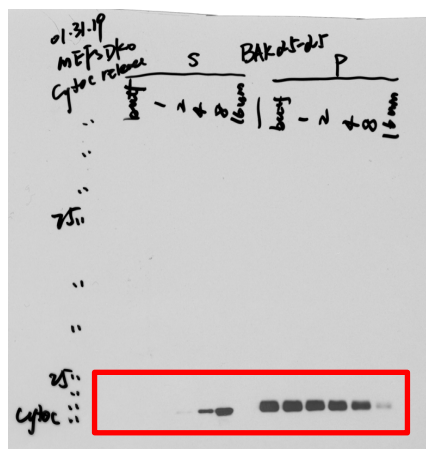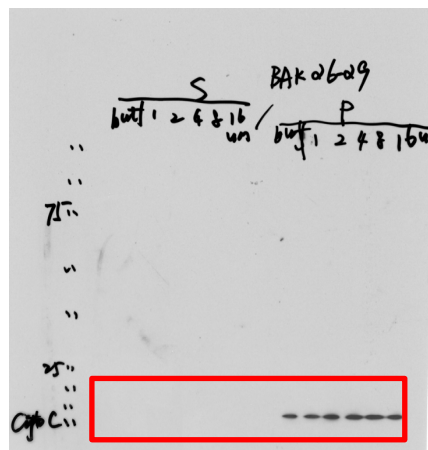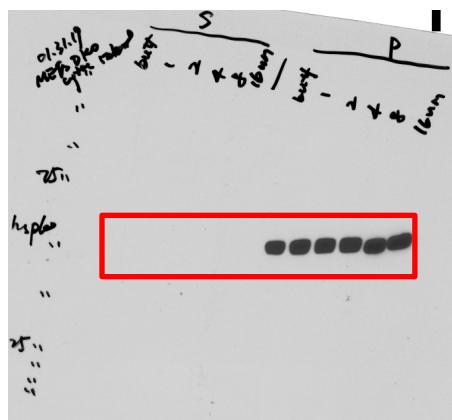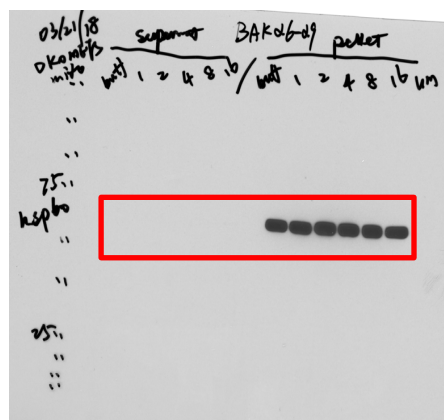

Figure 7c

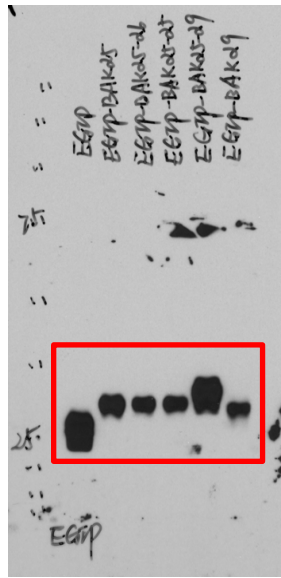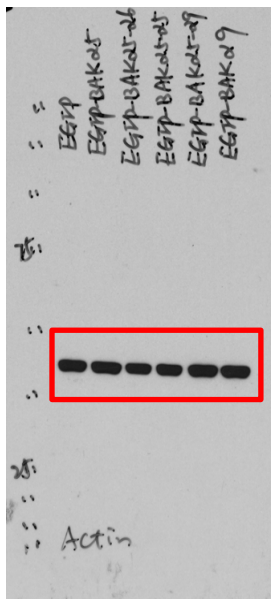

Figure 7e

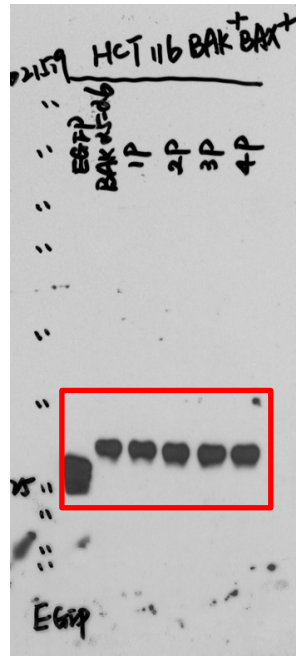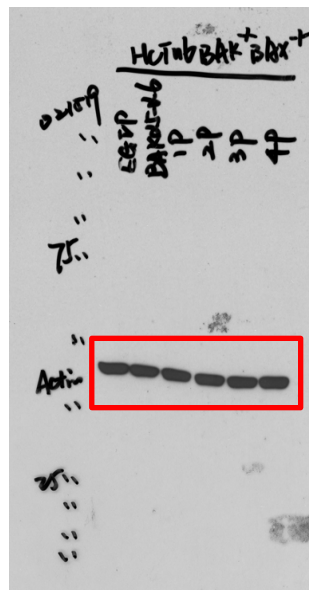

Figure 7f

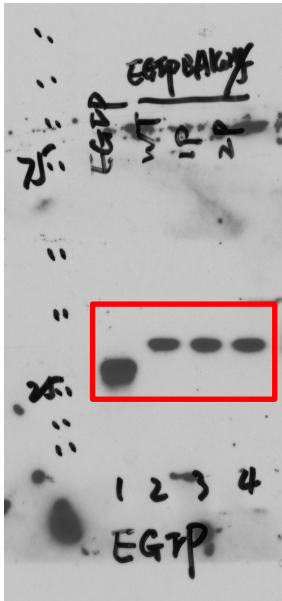

Figure 6G

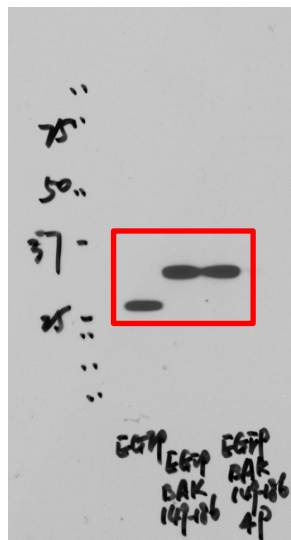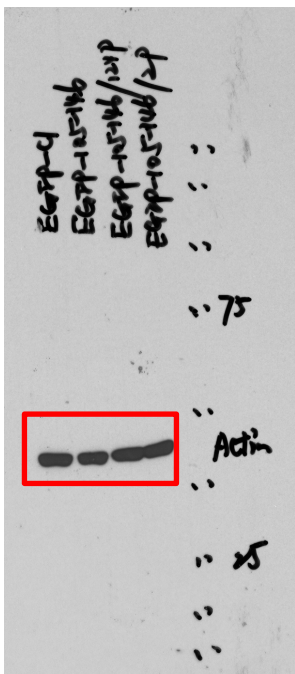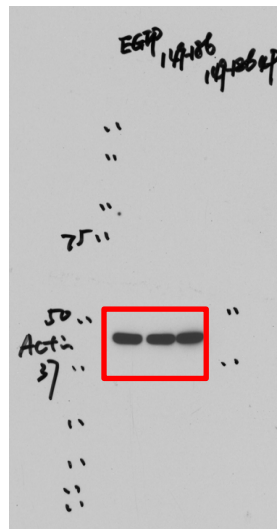

Figure 8c

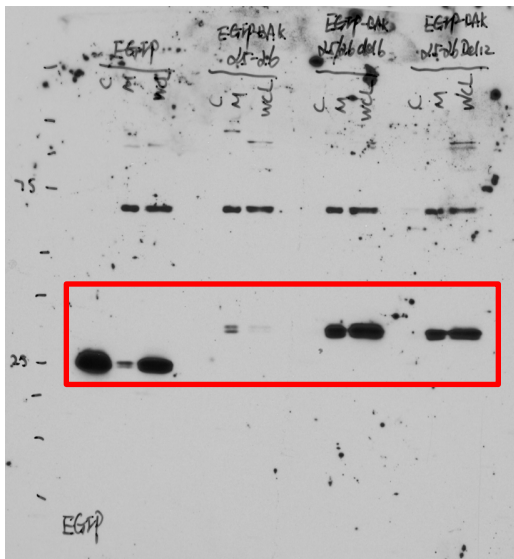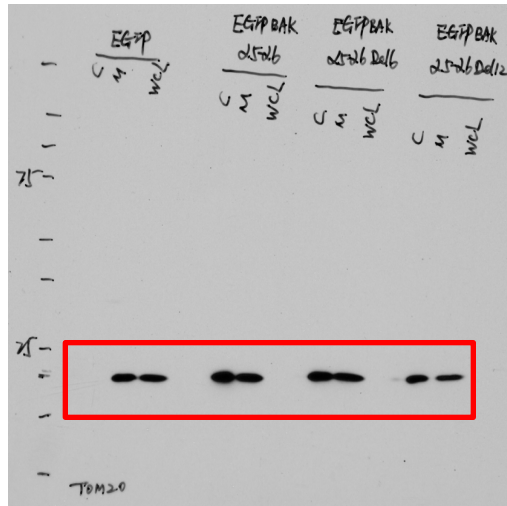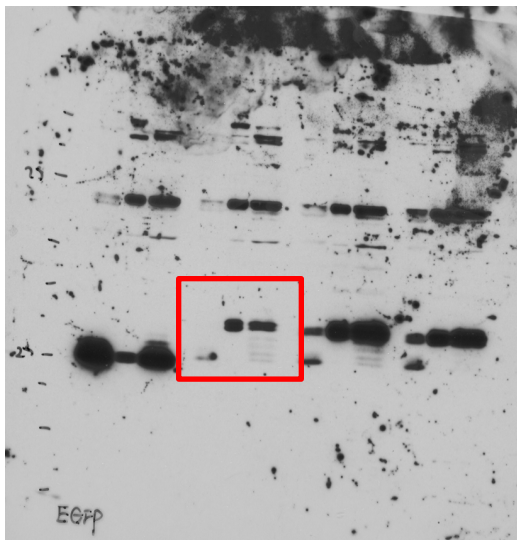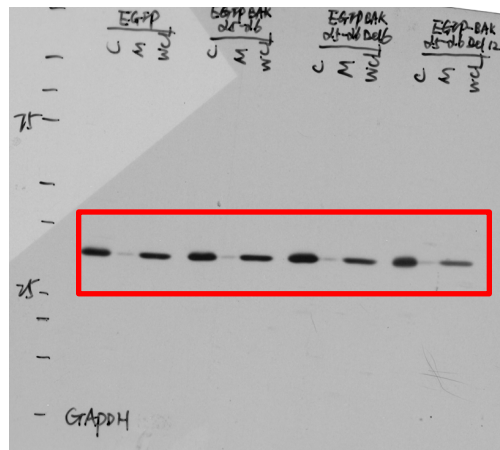

Figure 8d

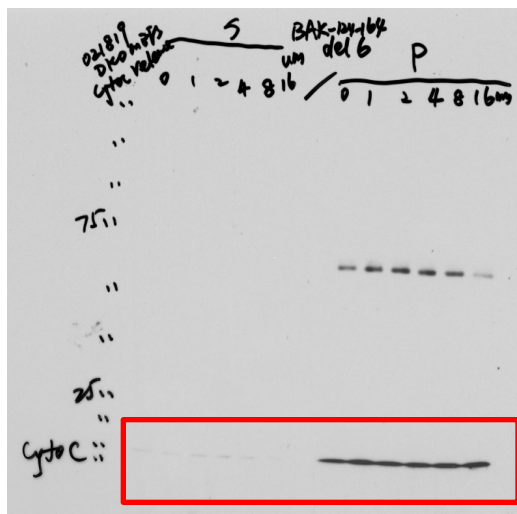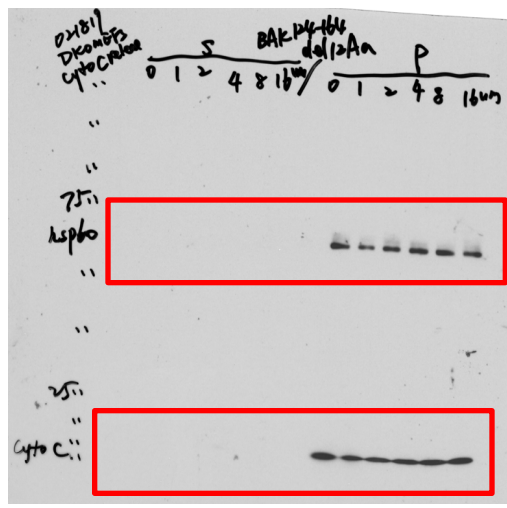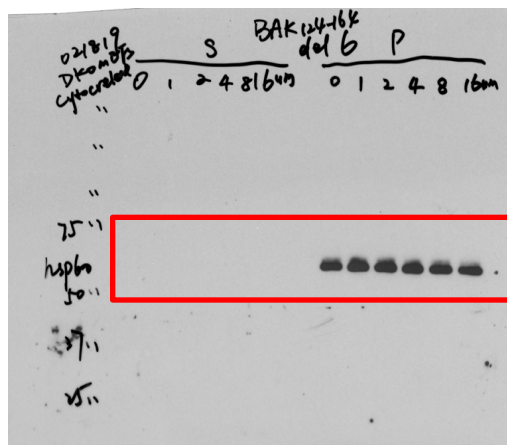

Supplement: 41418_2022_1083_MOESM2_ESM.pdf [file 41418_2022_1083_MOESM2_ESM.pdf]
