# Supplementary material
Source: PubMed Central journal article supplement (PMC9984382)

Fig. S1a

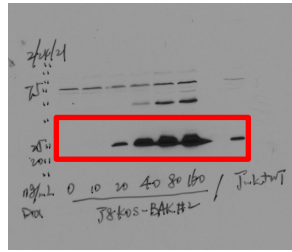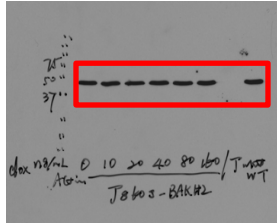

Fig. S1b

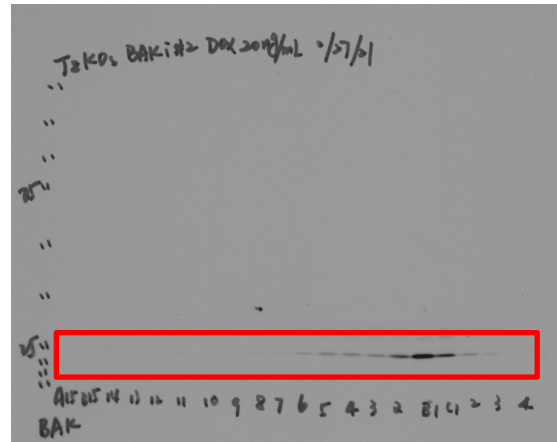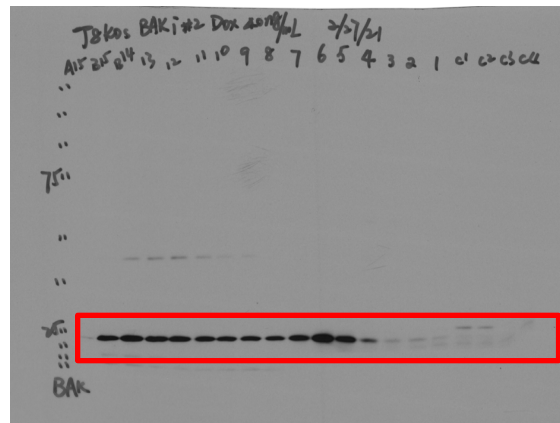

Fig. S1c

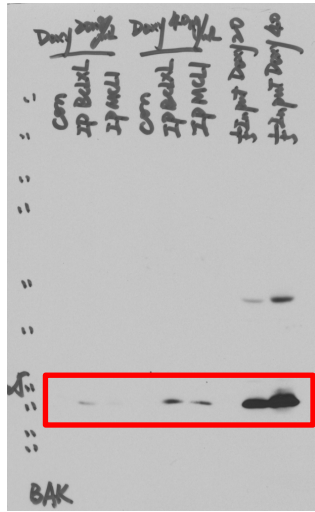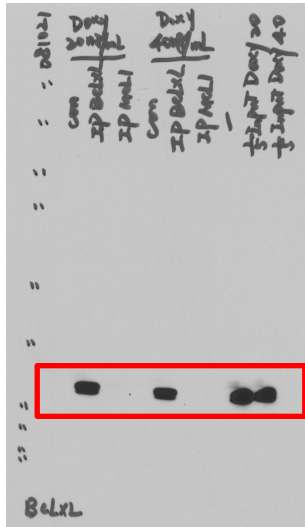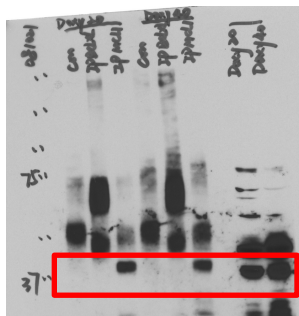

Fig. S1d

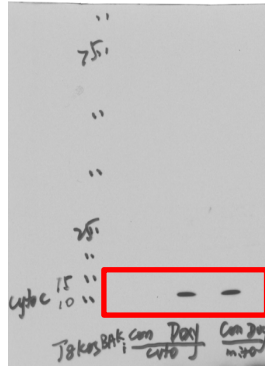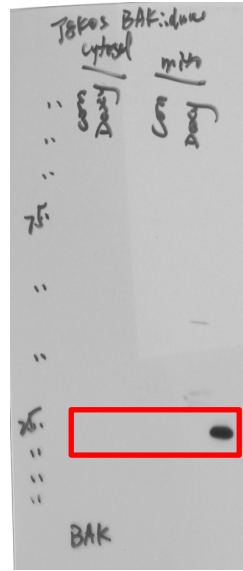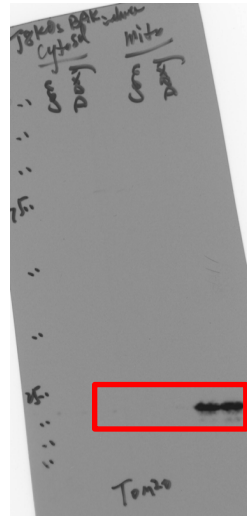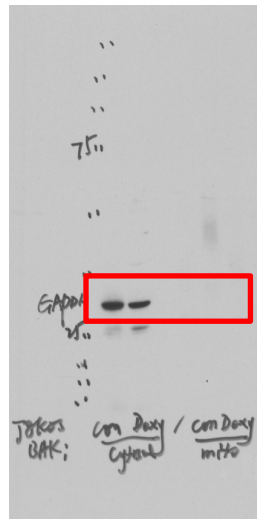

Fig. S8a

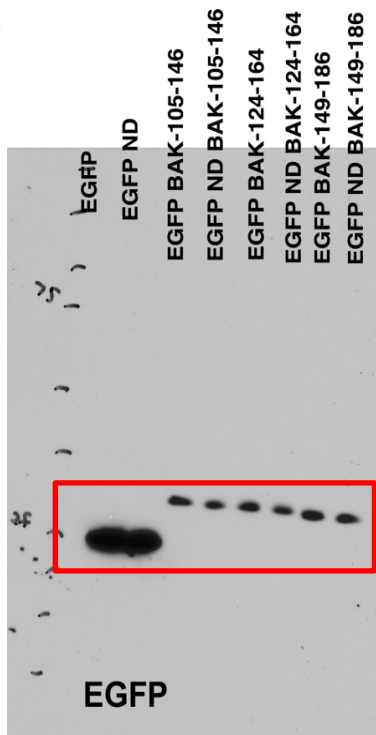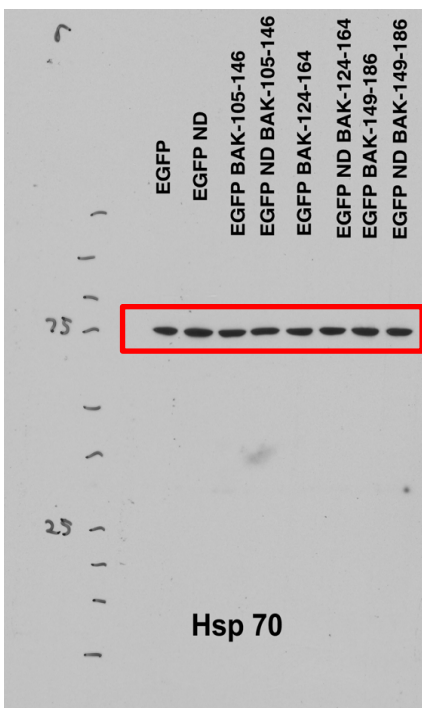

Fig. S8b

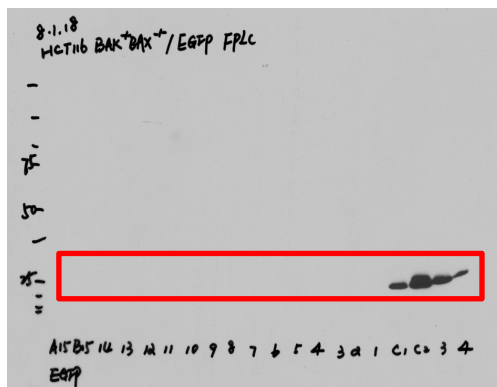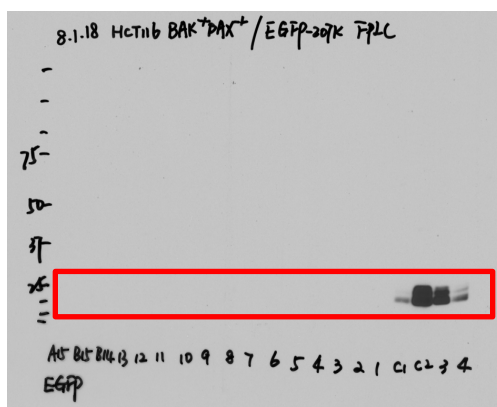

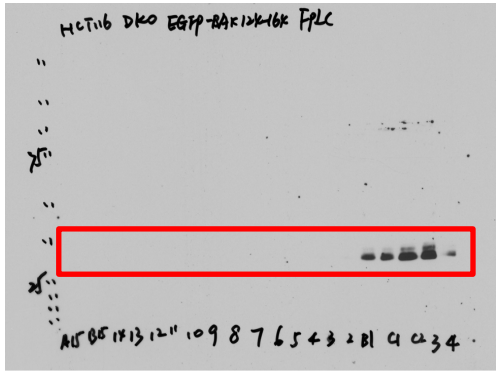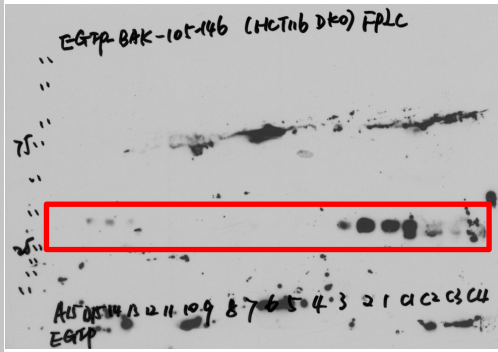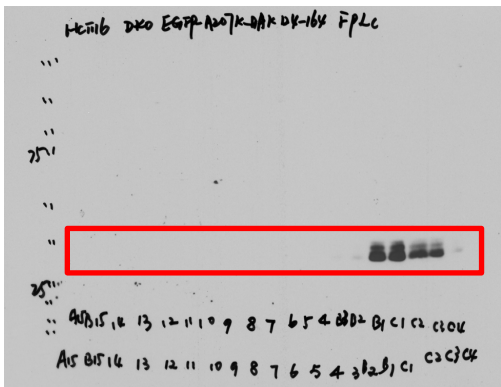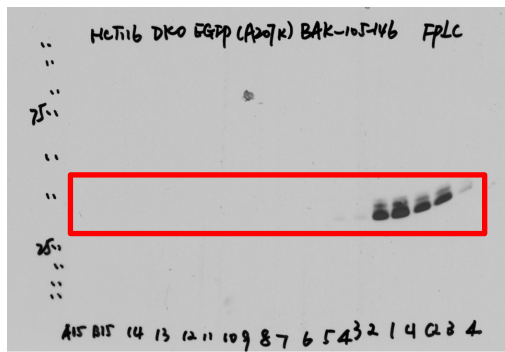

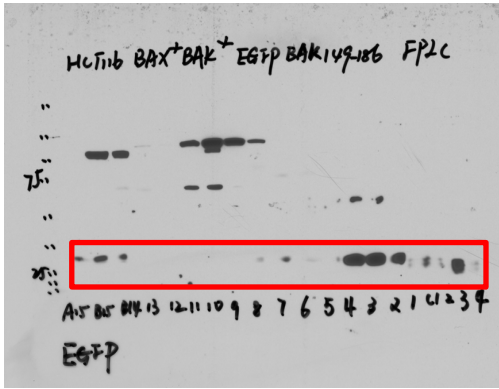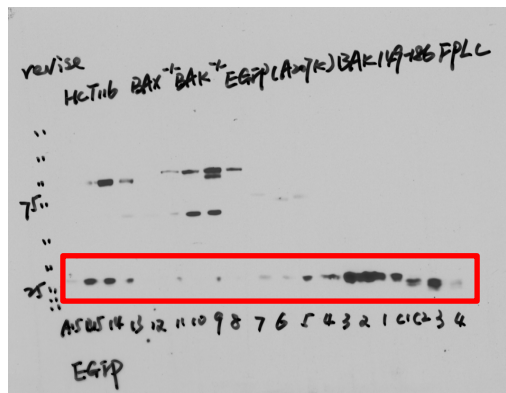

Figure S12a

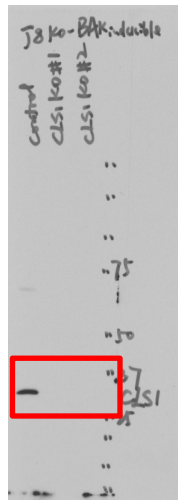

Figure S12b

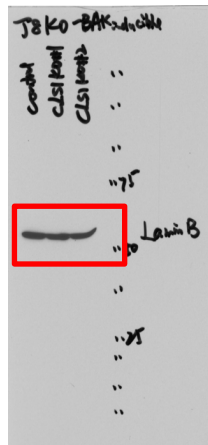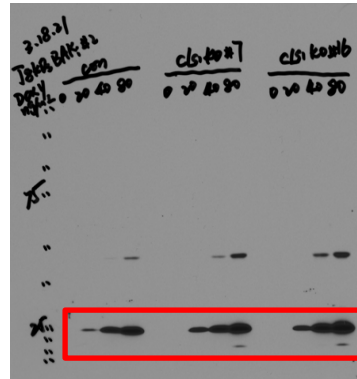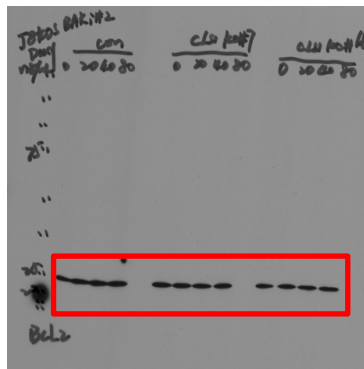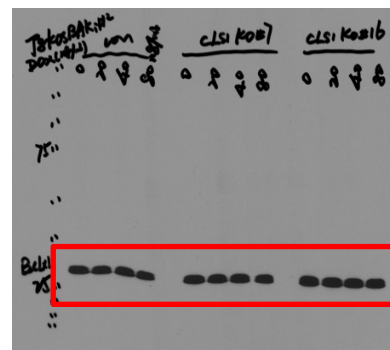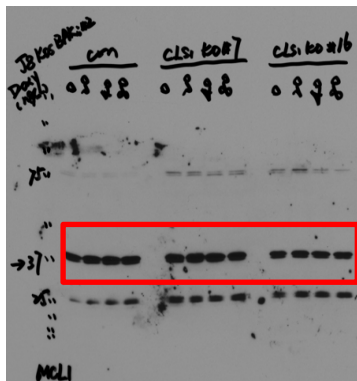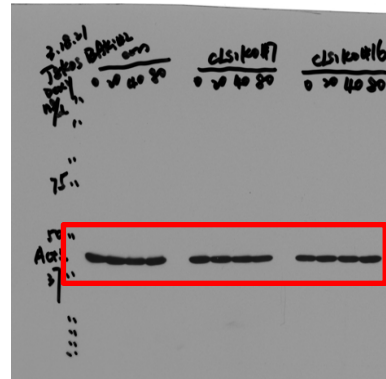

Figure S13b

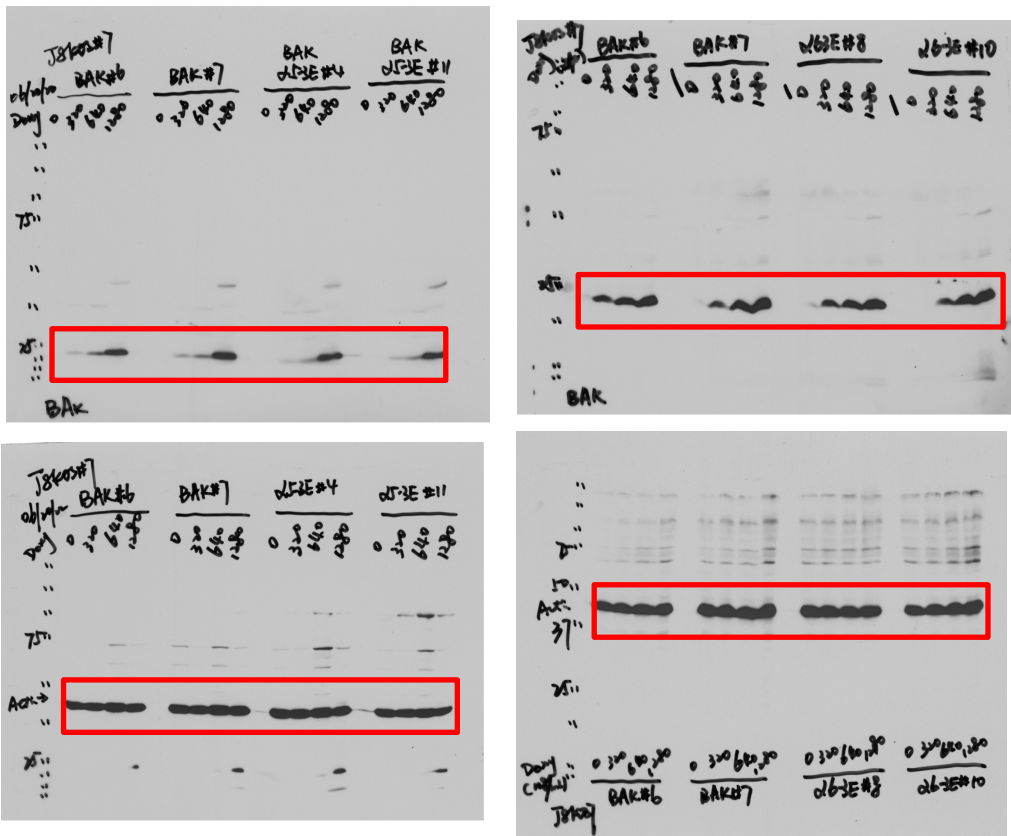

Figure S14c

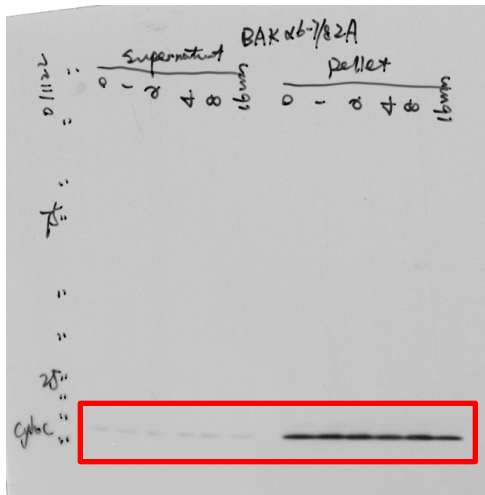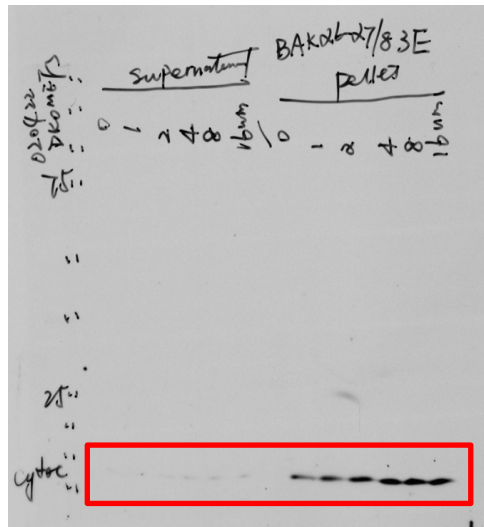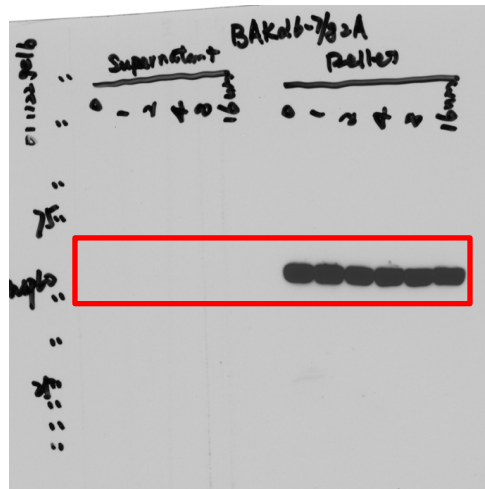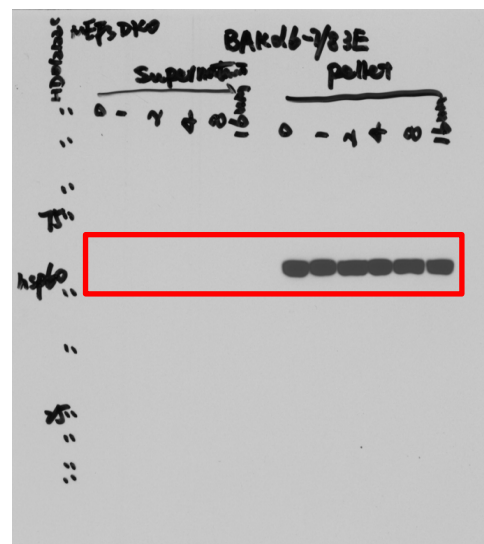



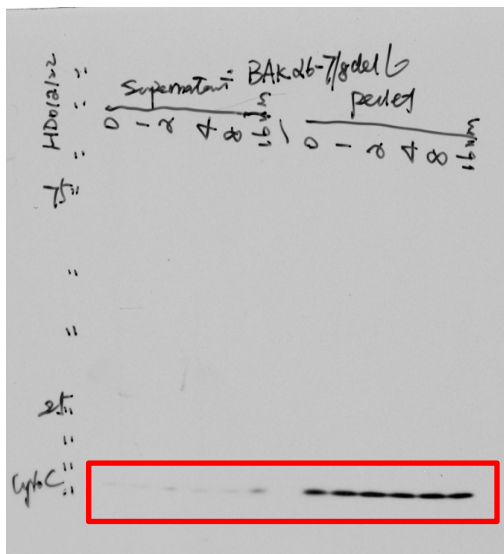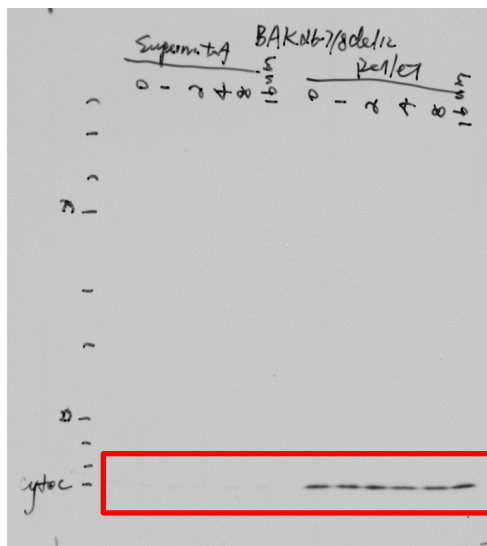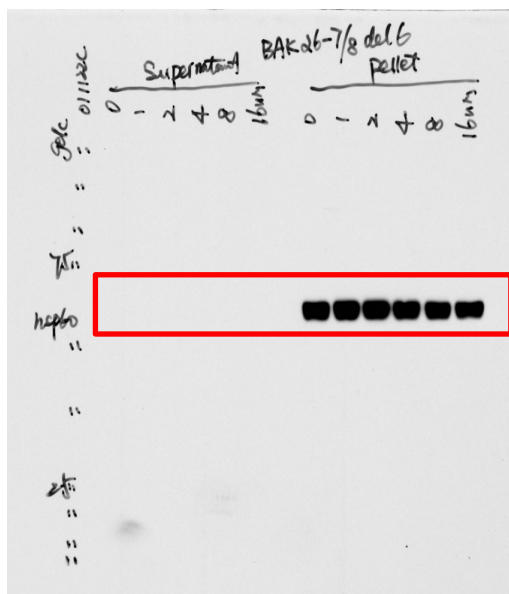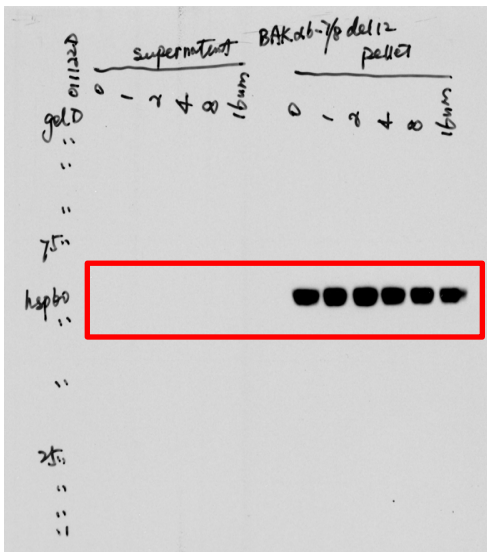

Supplement: 41418_2022_1083_MOESM3_ESM.pdf [file 41418_2022_1083_MOESM3_ESM.pdf]
